# Supplementary material
Source: Springer Nature journal article supplement (https://www.springermedizin.de/resource/supplementary/12943_2010_724_MOESM6_ESM.pdf/9554662)

A

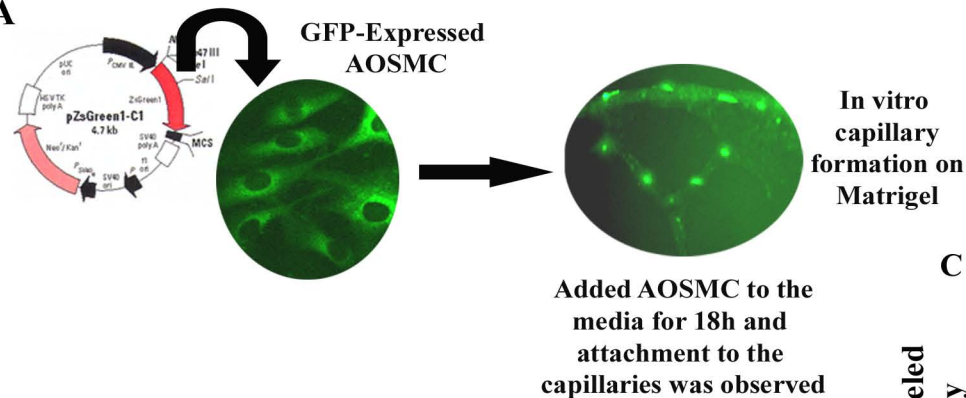

# B

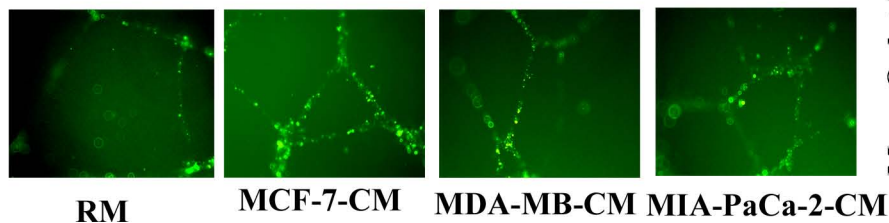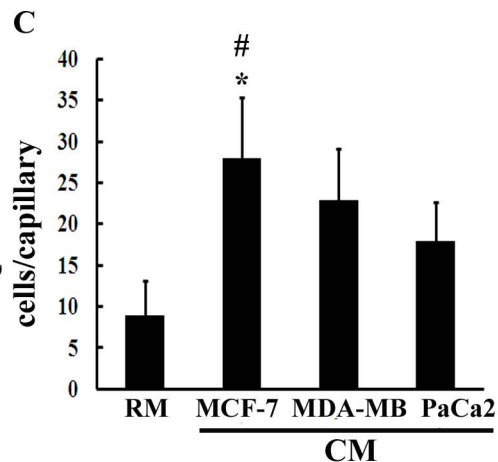

D

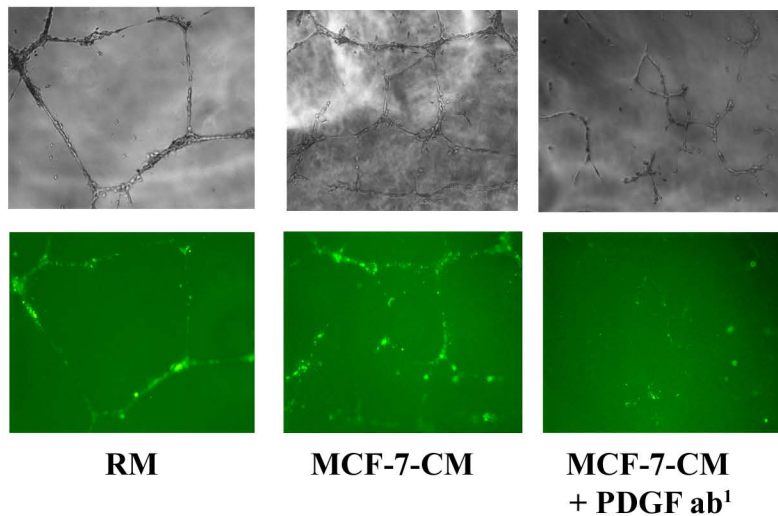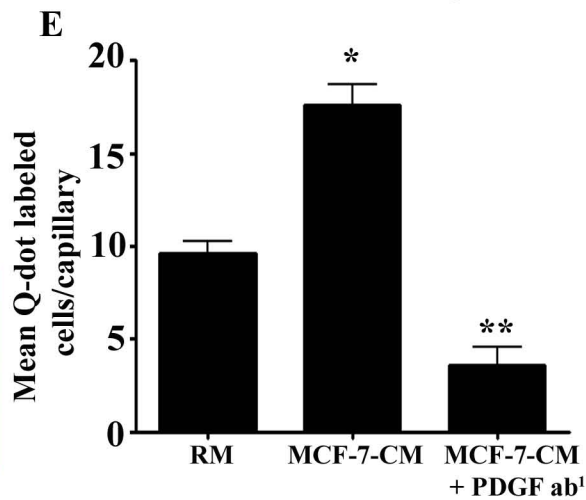

Supplement: MOESM6 [file 9554662]
